# Supplementary material
Source: HighWire-hosted journal article supplement (https://svn.bmj.com/content/svn-2023-002882)
Supplement: inline-supplementary-material-1 [file inline-supplementary-material-1.pdf]

## Supplemental Material

### Discontinuation of Antiplatelet Therapy After Stent-Assisted Coil Embolization of Cerebral Aneurysm: A Nationwide Cohort Study

#### Supplemental Methods

Figure S1. Daily antiplatelet regimen since stent-assisted coil embolization

Figure S2. Diagnostics for the proportional hazards assumption of the Cox proportional hazards model for the primary outcomes using Schoenfeld residuals

Figure S3. Cumulative incidence of cerebral infarction (A), and major hemorrhage (B) according to antiplatelet therapy regimen.

Figure S4. Plot of estimated time-varying hazard ratios of antiplatelet therapy regimen for cerebral infarction (A), and major hemorrhage (B) after stent-assisted coil embolization for unruptured cerebral aneurysm.

Table S1. Definition of variables based on health claim data

Table S2. Baseline characteristics of the patients included in the study

Table S3. Antiplatelet regimen changes after stent-assisted coil embolization

Table S4. Multivariable time-dependent Cox regression for primary outcomes after stent-assisted coil embolization for unruptured cerebral aneurysm

Table S5. Effect of antiplatelet therapy regimens on individual outcomes according to the exposure period after stent-assisted coil embolization for unruptured cerebral aneurysm

Table S6. Hemorrhage outcomes according to the exposure period after stent-assisted coil embolization for unruptured cerebral aneurysm

## Supplemental Methods

The Health Insurance Review and Assessment Service (HIRA) database contains the following information: sociodemographic details, reimbursement claims for hospital visits, prescriptions, procedures, diagnosis based on International Classification of Disease, 10<sup>th</sup> revision (ICD-10) coding, and the death records of the entire South Korean population. Researchers can gain access to the HIRA database by submitting a request to the Korean Health Insurance Review Health Bigdata Hub (<https://opendata.hira.or.kr>).

Based on the healthcare claim database, we identified patients with unruptured cerebral aneurysm (ICD-10 code of 'I67.1') who underwent endovascular coil embolization (M1661 and M1662) and intracranial stent implantation for stent-assisted coil embolization (SACE) (J5236). Insurance claims of intracranial stents for SACE are anonymized as J5236 (Enterprise [Cordis Neurovascular, Miami, FL, USA; J5236013], Neuroform [Stryker Neurovascular, Fremont, California, USA; J5236021], Neuroform EZ [Stryker Neurovascular, Fremont, California, USA; J5236031], Alpha [CGBio, Seongnam, Korea; J5236024], Solitaire AB [Medtronic, Irvine, CA, USA; J5236073], LVIS or LVIS Jr [MicroVention, Tustin, California, USA; J5236173], Acclino Flex plus [J5236174], Acclino Flex [Acandis, Pforzheim, Germany; J5236027], and Accero [Acandis, Pforzheim, Germany; J5236175]). Index date was the claim date for the SACE procedure.

We excluded patients with history of myocardial infarction (I21), stroke (I60-63, I69, S06.5, S06.6), thromboembolism of venous system (I26, I67.7, I80.2, I80.3, O22.5, O87.3, G08), cardiovascular intervention (claim for coronary intervention [M6551-2, M6561-4, M6571-2], coronary artery bypass graft [O1641-2, O1647, OA641-2, OA647], carotid endarterectomy [O0226, O0227, O2066], carotid/cerebral stent [M6601, M6602, M6605] and bypass surgery [S4661, S4662]), atrial fibrillation (I48), valvular heart disease (I05.0, I05.2, I05.9, Z95.2-Z95.4), end stage renal disease (N18.5, N18.6), hemodialysis (O7020, O7021, O9991), peritoneal dialysis (O2016, O7061), and kidney transplantation (R3280) before and at the index date.

Regarding comorbidities, we analyzed the presence of hypertension, diabetes mellitus, congestive heart failure, chronic renal disease, hepatic disease, chronic obstruction lung disease, and cancer. Hypertension and diabetes mellitus were ascertained as relevant only if the participants were prescribed anti-hypertensive or anti-diabetic agents with the related diagnostic codes (hypertension: I10-13, I15; diabetes mellitus, E10-14). Congestive heart failure was defined as the presence of diagnostic code of 'I50'. Chronic renal disease (N18-19, except N18.5, N18.6), hepatic disease (C22, K70.2, K70.3, K70.4, and K74.6, K70.1, B18.0-2) and chronic obstructive lung disease (J42-44, except J43.0) were identified when the patients received the diagnostic codes at least two times. Cancer was evaluated as the diagnostic code of malignancy (C00-C97) with cancer-specific registration codes (V027, V193-4).<sup>1</sup>

Regarding outcomes, we analyzed the presence of cerebral infarction and major hemorrhage. Cerebral infarction was defined as admitted with the primary diagnosis of I63 and underwent brain computed tomography (CT) or magnetic resonance imaging (MRI) at the hospital visit.<sup>2</sup> Major hemorrhage is a composite of hemorrhagic stroke or gastrointestinal bleeding. Hemorrhagic stroke was defined as admitted with the primary diagnosis of I60-62 and underwent brain CT or MRI at the hospital visit.<sup>3</sup> Gastrointestinal bleeding was defined as admission with

the related codes and receiving red blood cell transfusion during the admission.<sup>4</sup> Detailed definitions are described in Table S1.

**Figure S1.** Daily antiplatelet regimen since stent-assisted coil embolization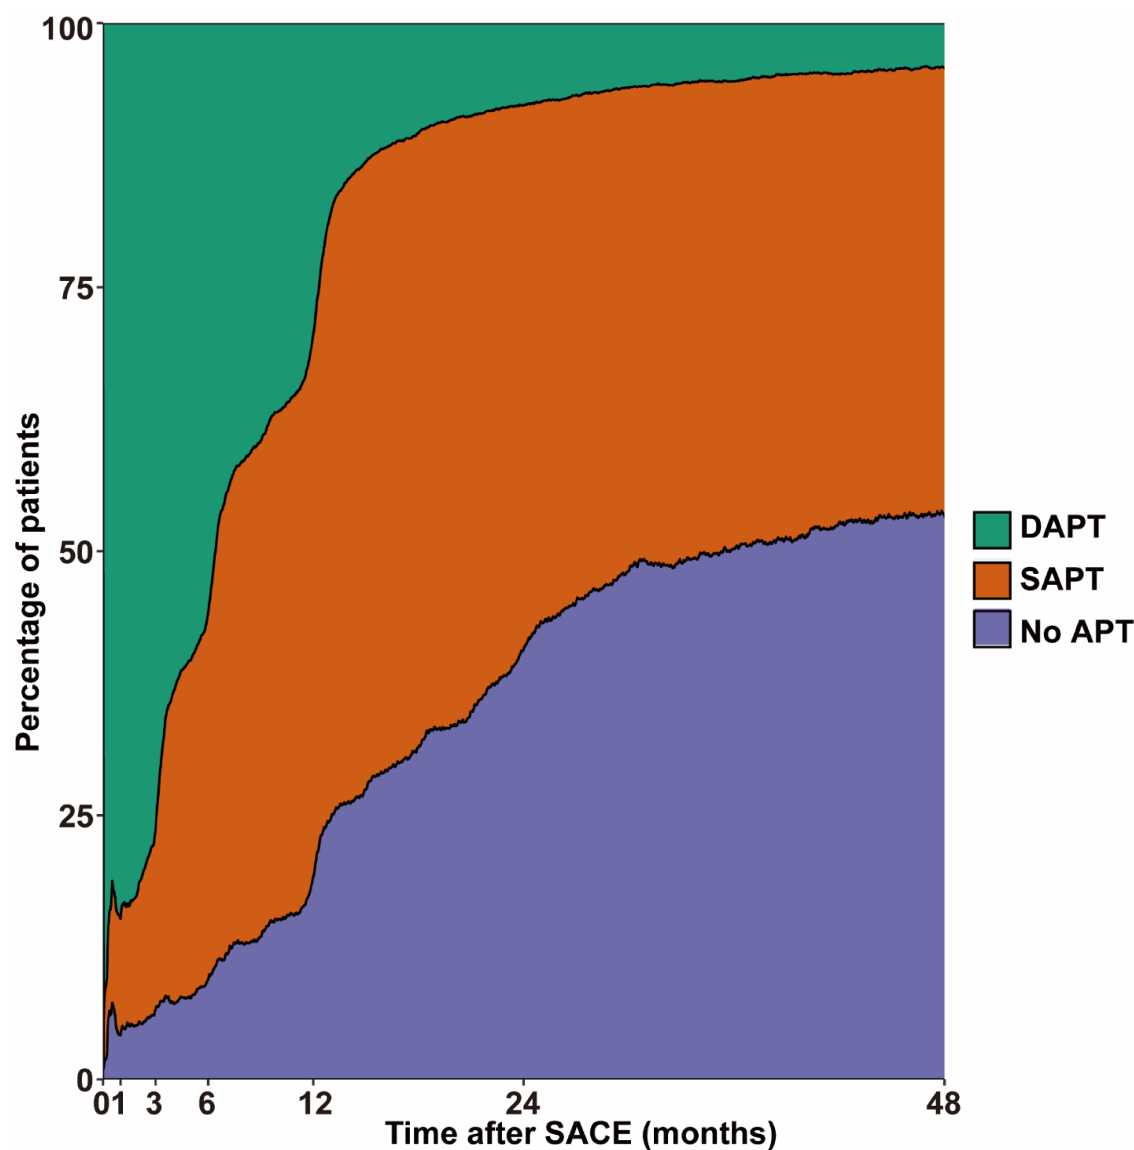

The diagram depicts the regimen of antiplatelet therapy (APT) on a daily basis since stent-assisted coil embolization. The green section illustrates the period and percentage of patients on dual APT (DAPT), the orange section represents the period and percentage of patients on single APT (SAPT), and the purple section indicates the period and percentage of patients without APT. APT, antiplatelet therapy; DAPT, dual APT; SACE, stent-assisted coil embolization; SAPT, single APT.

**Figure S2.** Diagnostics for the proportional hazards assumption of the Cox proportional hazards model for the primary outcomes using Schoenfeld residuals

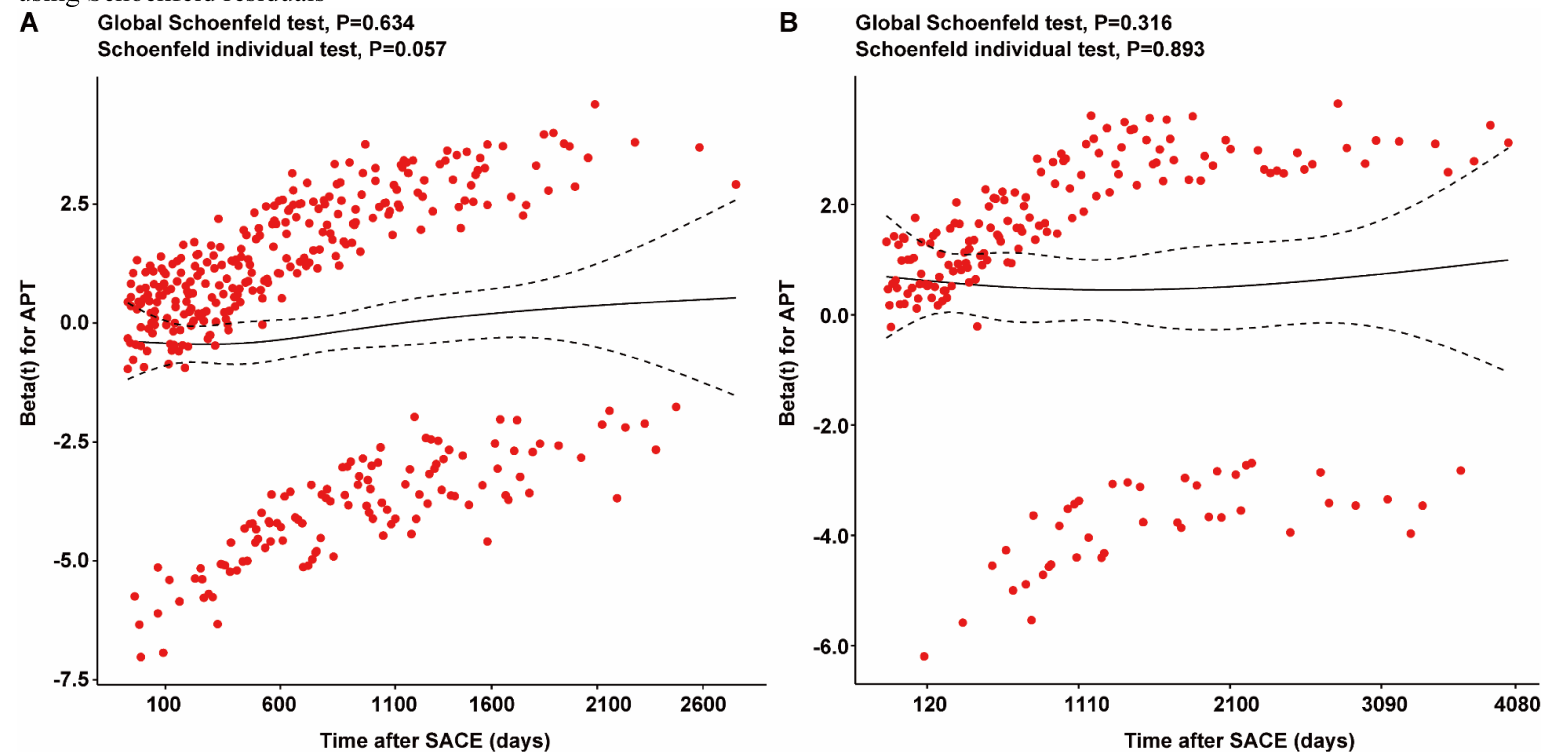

Models were adjusted for age, sex, type of insurance, hypertension, diabetes mellitus, congestive heart failure, chronic renal disease, hepatic disease, chronic obstructive lung disease, cancer, and use of statin.

APT, antiplatelet therapy; SACE, stent-assisted coil embolization .

**Figure S3.** Cumulative incidence of cerebral infarction (A), and major hemorrhage (B) according to antiplatelet therapy regimen.

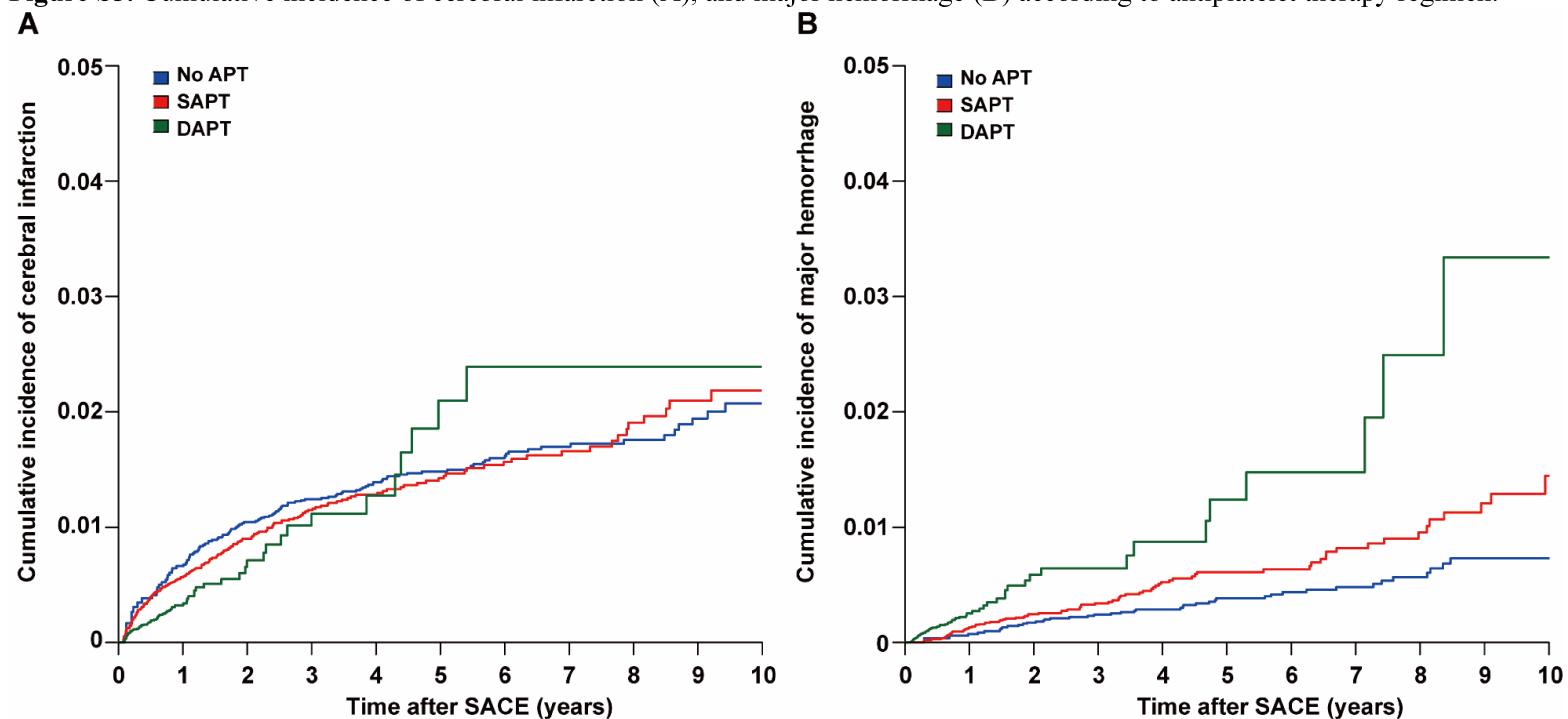

Cumulative incidence curves are illustrated using the Simon and Makuch method regarding the time-varying characteristic of antiplatelet therapy regimen. In the comparison between no APT, SAPT and DAPT, there was no significant difference in the risk of cerebral infarction (Mantel–Byar test,  $P > 0.999$ , Figure S3A). However, a notable difference was observed in the risk of major hemorrhage (Mantel–Byar test,  $P < 0.001$ , Figure S3B).

APT, antiplatelet therapy; DAPT, dual APT; SACE, stent-assisted coil embolization; SAPT, single APT.

**Figure S4.** Plot of estimated time-varying hazard ratios of antiplatelet therapy regimen for cerebral infarction (A), and major hemorrhage (B) after stent-assisted coil embolization for unruptured cerebral aneurysm.

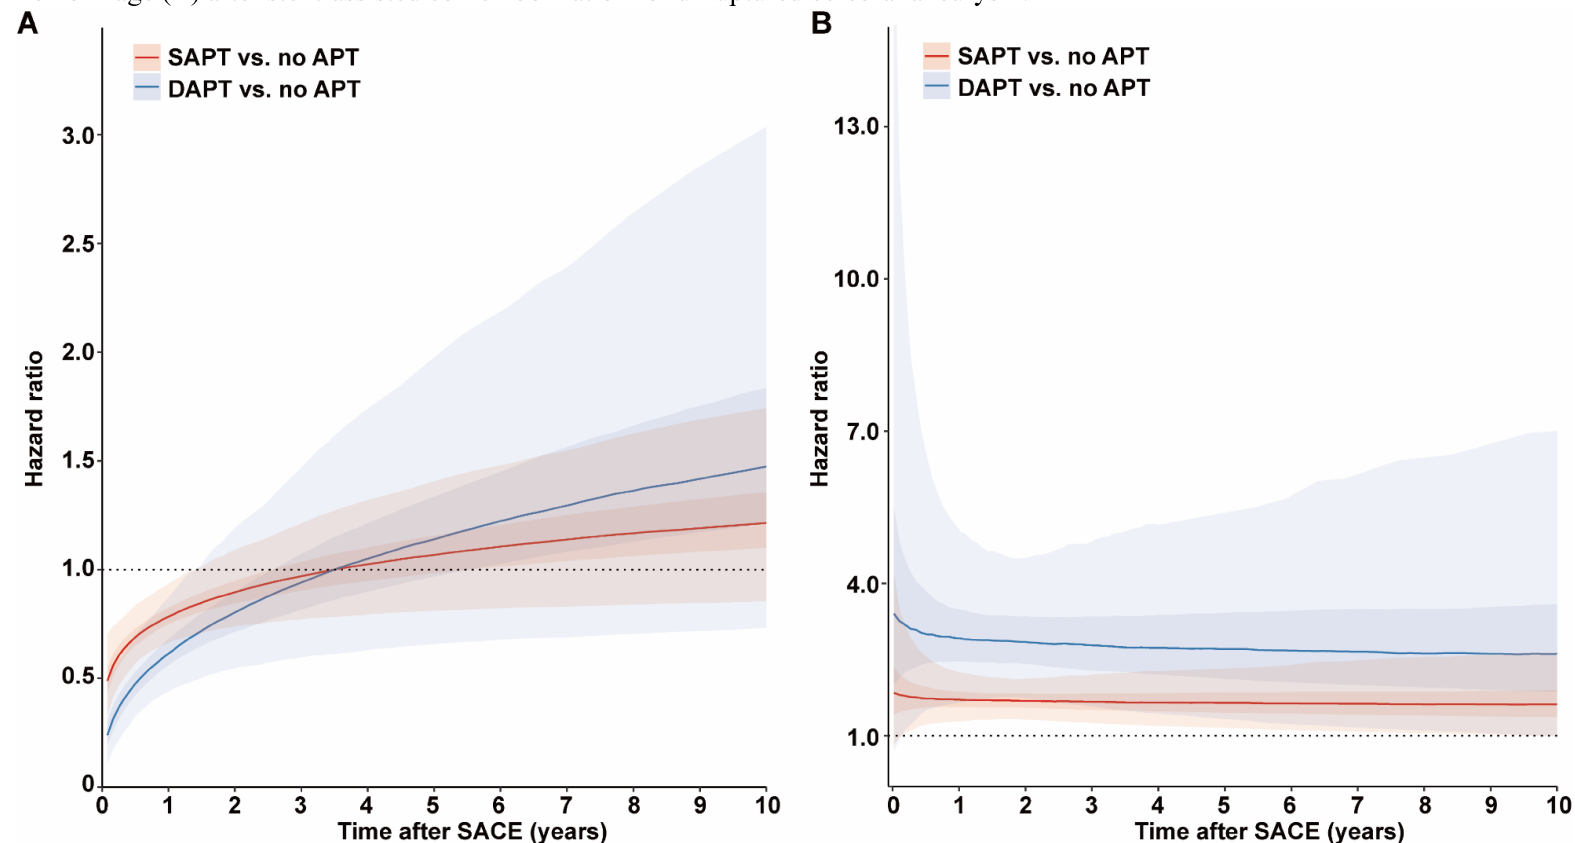

Plots show simulated time-varying hazard ratios of antiplatelet regimens based on the multivariable Cox model: no APT, SAPT, and DAPT, as a red solid line and the confidence intervals of central 50% (dark red) and 95% (light red) as shaded areas. APT, antiplatelet therapy; DAPT, dual APT; SACE, stent-assisted coil embolization; SAPT, single APT.

**Table S1.** Definition of variables based on health claim data

| ICD-10 and claim codes              |                                                                                                                                                                                                                                                                                                                                             |
|-------------------------------------|---------------------------------------------------------------------------------------------------------------------------------------------------------------------------------------------------------------------------------------------------------------------------------------------------------------------------------------------|
| <b>Inclusion/exclusion criteria</b> |                                                                                                                                                                                                                                                                                                                                             |
| Unruptured cerebral aneurysm        | I67.1                                                                                                                                                                                                                                                                                                                                       |
| Stent-assisted coil embolization    | Claim for assisted coil embolization (M1661, M1662) and claim for intracranial stent (Enterprise [J5236013], Neuroform [J5236021], Neuroform EZ [J5236031], Alpha [J5236024], Solitaire AB [J5236073], LVIS or LVIS Jr [J5236173], Acclino Flex plus [J5236174], Acclino Flex [J5236027], and Accero [J5236175])                            |
| Prior stroke                        | I60-63, S06.5, S06.6, I69                                                                                                                                                                                                                                                                                                                   |
| Prior myocardial infarction         | I21                                                                                                                                                                                                                                                                                                                                         |
| Prior venous thromboembolism        | I26, I80.2, I80.3, O22.5, O87.3, I67.6, G08                                                                                                                                                                                                                                                                                                 |
| Prior cardiovascular intervention   | Claim for coronary intervention (M6551-2, M6561-4, M6571-2), coronary artery bypass graft (O1641-2, O1647, OA641-2, OA647), carotid endarterectomy (O0226, O0227, O2066), carotid/cerebral stent (M6601, M6605, M6602) and bypass surgery (S4661, S4662)                                                                                    |
| Atrial fibrillation                 | I48                                                                                                                                                                                                                                                                                                                                         |
| Valvular heart disease              | I05.0, I05.2, I05.9, Z95.2-Z95.4                                                                                                                                                                                                                                                                                                            |
| End stage kidney disease            | N185, N186; or claim for hemodialysis (O7020, O7021, O9991), peritoneal dialysis (O2016, O7061), or kidney transplantation (R3280)                                                                                                                                                                                                          |
| <b>Comorbidities</b>                |                                                                                                                                                                                                                                                                                                                                             |
| Hypertension                        | I10-I13, I15; and prescription of antihypertensive drug                                                                                                                                                                                                                                                                                     |
| Diabetes mellitus                   | E10-E14; and prescription of antidiabetic drugs                                                                                                                                                                                                                                                                                             |
| Congestive heart failure            | I50                                                                                                                                                                                                                                                                                                                                         |
| Chronic renal disease               | N18-19, except N18.5, N18.6 at least 2 times                                                                                                                                                                                                                                                                                                |
| Hepatic disease                     | C22, K70.2, K70.3, K70.4, and K74.6, K70.1, B18.0-2 at least 2 times                                                                                                                                                                                                                                                                        |
| Chronic obstructive lung disease    | J42-J44, except J43.0 at least 2 times                                                                                                                                                                                                                                                                                                      |
| Cancer                              | C00-97; and cancer registration code (V193, V027, V194)                                                                                                                                                                                                                                                                                     |
| <b>Outcome</b>                      |                                                                                                                                                                                                                                                                                                                                             |
| Cerebral infarction                 | Admission with primary diagnosis of I63; and brain CT or MRI                                                                                                                                                                                                                                                                                |
| Hemorrhagic stroke                  | Admission with primary diagnosis of I60-62; and brain CT or MRI                                                                                                                                                                                                                                                                             |
| Gastrointestinal hemorrhage         | Admission with primary diagnosis of K22.6, K25.0, K25.2, K25.4, K25.6, K26.0, K26.2, K26.4, K26.6, K27.0, K27.2, K27.4, K27.6, K28.0, K28.2, K28.4, K28.6, K29.0, K92.0, K92.1, I85.0, I98.3, K22.11, K31.81; and claims of red blood cell transfusion (X2021, X2022, X2031, X2032, X2131, X2132, X2091, X2092, X2111, X2112, X2515, X2512) |
| Major hemorrhage                    | Hemorrhagic stroke or gastrointestinal hemorrhage                                                                                                                                                                                                                                                                                           |

**Table S2.** Baseline characteristics of the patients included in the study

| Variable                         | Total (n = 17692) |
|----------------------------------|-------------------|
| Sex, female                      | 13523 (76.44)     |
| Age, years                       | 57.66 ± 10.81     |
| Insurance type                   |                   |
| Health insurance                 | 17096 (96.63)     |
| Medical aid                      | 596 (3.37)        |
| Comorbidity                      |                   |
| Hypertension                     | 10097 (57.07)     |
| Diabetes mellitus                | 2559 (14.46)      |
| Congestive heart failure         | 898 (5.05)        |
| Chronic renal disease            | 263 (1.49)        |
| Hepatic disease                  | 1012 (5.72)       |
| Chronic obstructive lung disease | 2572 (14.54)      |
| Cancer                           | 1200 (6.76)       |

The data are represented as numbers (%) or mean ± standard deviation.

**Table S3.** Antiplatelet regimen changes after stent-assisted coil embolization

|                             | <b>1 month</b> | <b>3 months</b> | <b>6 months</b> | <b>12 months</b> | <b>24 months</b> |
|-----------------------------|----------------|-----------------|-----------------|------------------|------------------|
| <b>Number at risk</b>       | 17692          | 17597           | 17348           | 15619            | 12259            |
| <b>Antiplatelet regimen</b> |                |                 |                 |                  |                  |
| <b>No APT</b>               | 740 (4.2)      | 1144 (6.5)      | 1618 (9.3)      | 3201 (20.5)      | 5109 (41.7)      |
| <b>APT</b>                  | 16952 (95.8)   | 16453 (93.5)    | 15730 (90.7)    | 12418 (79.5)     | 7150 (58.3)      |
| <b>SAPT</b>                 | 1962 (11.1)    | 2933 (16.7)     | 5972 (34.4)     | 8102 (51.9)      | 6218 (50.7)      |
| Aspirin                     | 886 (45.2)     | 1576 (53.7)     | 3966 (66.4)     | 5597 (69.1)      | 4155 (66.8)      |
| P2Y12 inhibitor*            | 1020 (52.0)    | 1277 (43.5)     | 1783 (29.9)     | 2200 (27.2)      | 1769 (28.4)      |
| Other†                      | 56 (2.9)       | 80 (2.7)        | 223 (3.7)       | 305 (3.8)        | 294 (4.7)        |
| <b>DAPT</b>                 | 14990 (84.7)   | 13520 (76.8)    | 9758 (56.3)     | 4316 (27.6)      | 932 (7.6)        |
| Aspirin + P2Y12 inhibitor*  | 13773 (91.9)   | 12525 (92.6)    | 8948 (91.7)     | 3819 (88.5)      | 770 (82.6)       |
| Aspirin + Other†            | 1217 (8.1)     | 995 (7.4)       | 810 (8.3)       | 497 (11.5)       | 162 (17.4)       |

\*P2Y12 inhibitors include clopidogrel, ticlopidine, prasugrel, and ticagrelor; †other antiplatelet agents include triflusal and cilostazol.

APT, antiplatelet therapy; DAPT, dual APT; SAPT, single APT.

**Table S4.** Multivariable time-dependent Cox regression for primary outcomes after stent-assisted coil embolization for unruptured cerebral aneurysm

| Variable                         | Cerebral infarction  | P value | Major hemorrhage     | P-value |
|----------------------------------|----------------------|---------|----------------------|---------|
|                                  | Adjusted HR (95% CI) |         | Adjusted HR (95% CI) |         |
| Sex, male                        | 1.06 [0.83–1.35]     | 0.657   | 1.38 [1.00–1.90]     | 0.049   |
| Age, years                       | 1.04 [1.03–1.05]     | <.001   | 1.04 [1.03–1.06]     | <.001   |
| Insurance type                   |                      |         |                      |         |
| Health insurance                 | 1 (ref)              |         | 1 (ref)              |         |
| Medical aid                      | 1.67 [1.11–2.51]     | 0.014   | 0.65 [0.26–1.61]     | 0.353   |
| Comorbidity                      |                      |         |                      |         |
| Hypertension                     | 1.45 [1.13–1.86]     | 0.003   | 1.05 [0.76–1.45]     | 0.762   |
| Diabetes mellitus                | 1.47 [1.15–1.87]     | 0.002   | 1.41 [0.99–2.02]     | 0.058   |
| Congestive heart failure         | 1.35 [0.92–1.97]     | 0.126   | 0.64 [0.30–1.37]     | 0.255   |
| Chronic renal disease            | 0.93 [0.43–2.01]     | 0.863   | 1.37 [0.50–3.73]     | 0.539   |
| Hepatic disease                  | 0.65 [0.39–1.09]     | 0.105   | 1.00 [0.55–1.82]     | 0.999   |
| Chronic obstructive lung disease | 1.10 [0.84–1.45]     | 0.480   | 1.13 [0.76–1.67]     | 0.551   |
| Cancer                           | 0.96 [0.64–1.45]     | 0.842   | 1.02 [0.58–1.79]     | 0.953   |
| Medication                       |                      |         |                      |         |
| Statin                           | 0.93 [0.74–1.17]     | 0.539   | 0.72 [0.52–0.99]     | 0.040   |
| APT*                             |                      |         |                      |         |
| 1 to 12 months                   | 0.56 [0.35–0.89]     | 0.014   | 3.69 [0.89–15.36]    | 0.072   |
| 12 to 24 months                  | 0.73 [0.48–1.12]     | 0.144   | 1.23 [0.60–2.52]     | 0.568   |
| > 24 months                      | 1.01 [0.72–1.43]     | 0.933   | 1.76 [1.11–2.77]     | 0.016   |

Data were obtained from multivariable time-dependent Cox proportional hazards regression model for the development of outcome. Reference is absence of APT at the time period.

Adjustments were done for age, sex, insurance type, hypertension, diabetes mellitus, congestive heart failure, chronic renal disease, hepatic disease, chronic obstructive lung disease, cancer, and use of statin.

APT, antiplatelet therapy; CI, confidence interval.

**Table S5.** Effect of antiplatelet therapy regimens on individual outcomes according to the exposure period after stent-assisted coil embolization for unruptured cerebral aneurysm

| Exposure period | Regimen | Cerebral infarction (n=379) |              |                  |         | Major hemorrhage (n=190) |              |                   |         |
|-----------------|---------|-----------------------------|--------------|------------------|---------|--------------------------|--------------|-------------------|---------|
|                 |         | Number at risk              | Event number | aHR (95% CI)     | P value | Number at risk           | Event number | aHR (95% CI)      | P value |
| 1 to 12 months  | No APT  | 740                         | 21           | Ref              |         | 740                      | 2            | Ref               |         |
|                 | SAPT    | 1962                        | 54           | 0.74 [0.45–1.23] | 0.250   | 1962                     | 17           | 2.69 [0.60–12.01] | 0.194   |
|                 | DAPT    | 14990                       | 66           | 0.42 [0.25–0.69] | <0.001  | 14990                    | 49           | 4.65 [1.09–19.85] | 0.038   |
| 12 to 24 months | No APT  | 3221                        | 33           | Ref              |         | 3217                     | 10           | Ref               |         |
|                 | SAPT    | 8130                        | 54           | 0.77 [0.50–1.21] | 0.250   | 8145                     | 20           | 1.09 [0.52–2.29]  | 0.813   |
|                 | DAPT    | 4328                        | 10           | 0.62 [0.30–1.26] | 0.186   | 4388                     | 9            | 2.26 [0.95–5.40]  | 0.067   |
| >24 months      | No APT  | 5147                        | 64           | Ref              |         | 5130                     | 30           | Ref               |         |
|                 | SAPT    | 6248                        | 63           | 0.90 [0.62–1.32] | 0.603   | 6302                     | 43           | 1.59 [0.98–2.58]  | 0.059   |
|                 | DAPT    | 938                         | 14           | 1.66 [0.90–3.04] | 0.102   | 1021                     | 10           | 3.79 [1.77–8.11]  | <0.001  |

Data were obtained from multivariable time-dependent Cox proportional hazards regression model for the development of outcome. The reference is the absence of APT during this period. Adjustments were done for age, sex, insurance type, hypertension, diabetes mellitus, congestive heart failure, chronic renal disease, hepatic disease, chronic obstructive lung disease, cancer, and use of statin. aHR, adjusted hazard ratio; APT, antiplatelet therapy; CI, confidence interval; DAPT, dual APT; SAPT, single APT.

**Table S6.** Hemorrhage outcomes according to the exposure period after stent-assisted coil embolization for unruptured cerebral aneurysm

|                 | Number at risk | Major hemorrhage<br>(n=190) | Hemorrhagic stroke<br>(n=94) | Gastrointestinal<br>hemorrhage (n=96) |
|-----------------|----------------|-----------------------------|------------------------------|---------------------------------------|
| 1 to 12 months  | 17692          | 68                          | 32                           | 36                                    |
| 12 to 24 months | 15619          | 39                          | 22                           | 17                                    |
| >24 months      | 12259          | 83                          | 40                           | 43                                    |

**Supplemental Reference**

1. Han M, Tran TPT, Oh JK. Chronic pancreatitis and cancer risk in a matched cohort study using national claims data in south korea. *Sci Rep*. 2022;12:5545. doi:10.1038/s41598-022-09426-z
2. Kim J, Lee HS, Nam CM, Heo JH. Effects of statin intensity and adherence on the long-term prognosis after acute ischemic stroke. *Stroke*. 2017;48:2723-2730. doi:10.1161/STROKEAHA.117.018140
3. Cho MS, Yun JE, Park JJ, Kim YJ, Lee J, Kim H, Park D-W, Nam G-B. Outcomes after use of standard- and low-dose non-vitamin k oral anticoagulants in asian patients with atrial fibrillation. *Stroke*. 2019;50:110-118. doi:10.1161/STROKEAHA.118.023093
4. Kim SH, Han K, Kang G, Lee SW, Park CM, Cho J, Choi JW, Park SJ, Kang M, Kim TJ, et al. Risk of postoperative gastrointestinal bleeding and its associated factors: A nationwide population-based study in korea. *J Pers Med*. 2021;11. doi:10.3390/jpm11111222
